# Supplementary material for: Calling SNPs without a reference sequence
Source: Springer Nature journal article supplement (doi:10.1186/1471-2105-11-130), 2010-03-15

Variation of SNP counts with coverage (closeup)

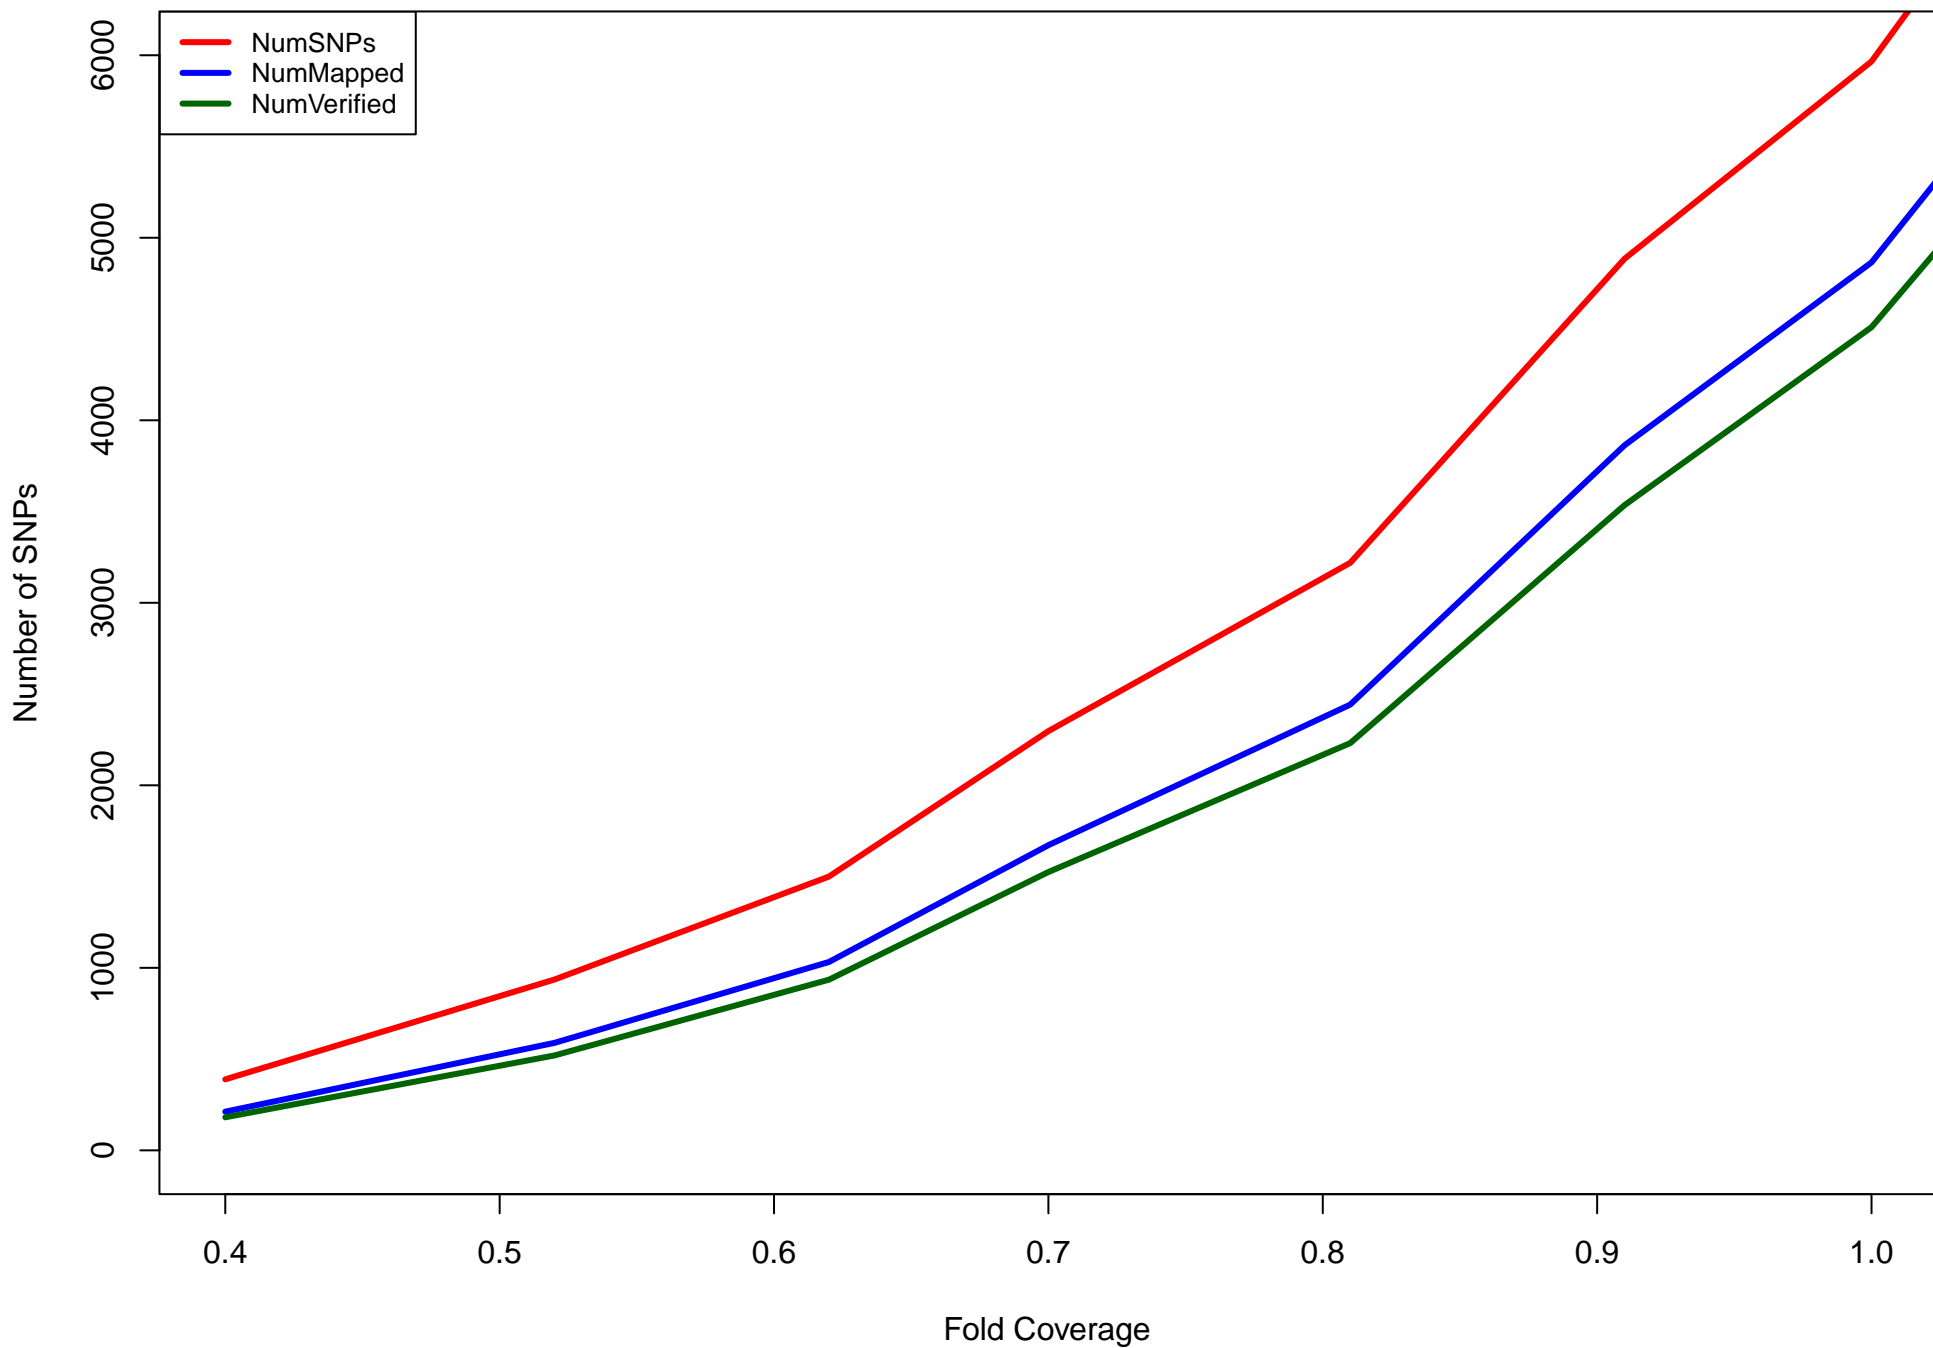

Supplement: 12859_2009_3587_MOESM3_ESM.pdf [file 12859_2009_3587_MOESM3_ESM.pdf]
